# Supplementary material for: Sulfur-doped porous carbon nanosheets as high performance electrocatalysts for PhotoFuelCells
Source: Royal Society of Chemistry journal article supplement (doi:10.1039/c5ra02027a), 2015-01-01
Supplement: c5ra02027a1.pdf [file c5ra02027a1.pdf]

## Supporting Information

### **Sulfur-doped porous carbon nanosheets as high performance electrocatalysts in PhotoFuelCells**

*Stavroula Sfaelou<sup>a</sup>, Xiaodong Zhuang<sup>b</sup>, Xinliang Feng<sup>b,c\*</sup>, Panagiotis Lianos<sup>a\*</sup>,*

<sup>a</sup> Department of Chemical Engineering, University of Patras, 26500 Patras, Greece

<sup>b</sup> School of Chemistry and Chemical Engineering, Shanghai Jiao Tong University, 200240 Shanghai, China

<sup>c</sup> Center for Advancing Electronics Dresden (cfaed) & Department of Chemistry and Food Chemistry, Technische Universitaet Dresden, 01062 Dresden, Germany

### **Additional diagrams**

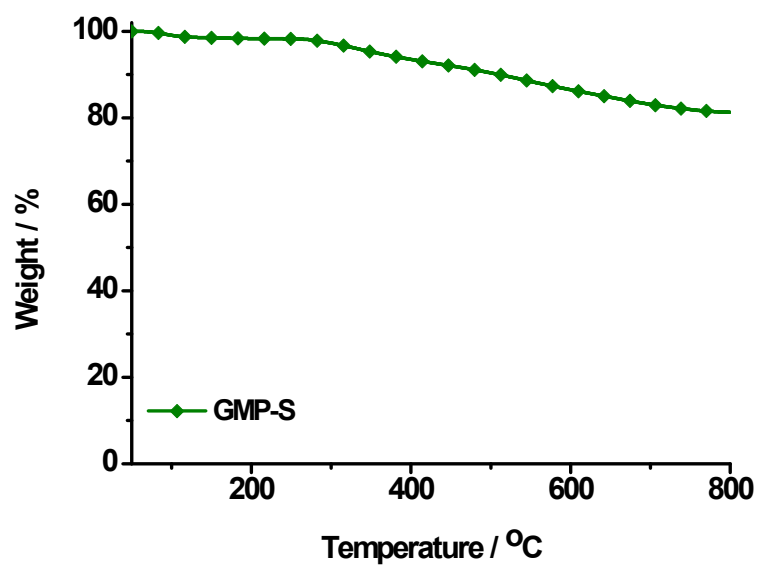

Figure S1. TGA curve of GMP-S.

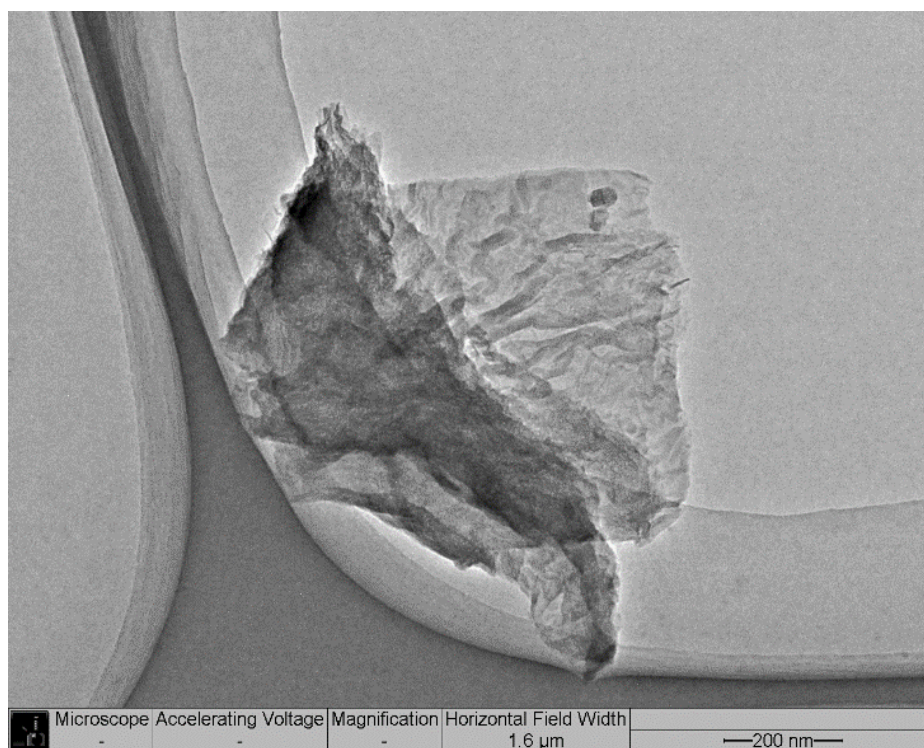

Figure S2. TEM image of GMC-S900.

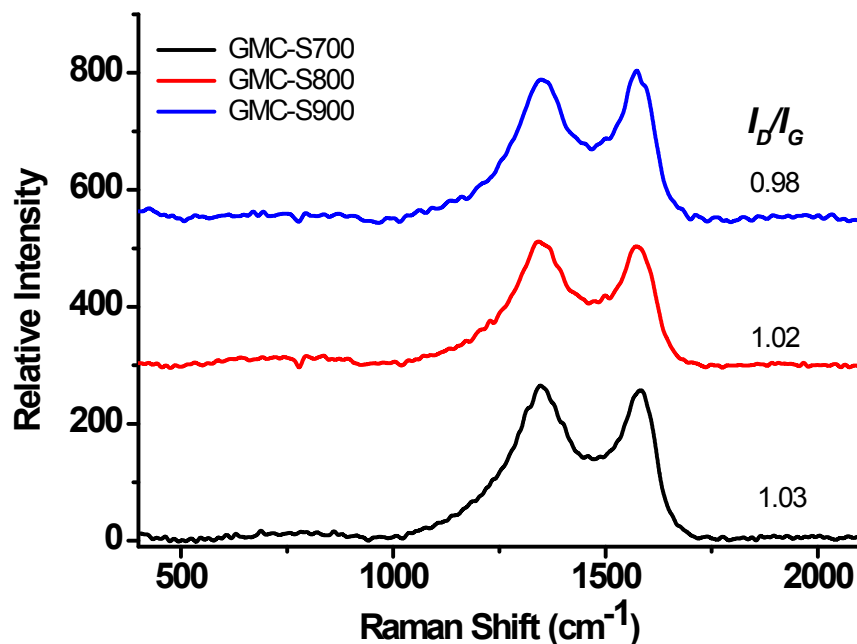

**Figure S3.** Raman spectra for GMC-S700, GMC-S800, GMC-S900.

Raman spectroscopy is used to elucidate vibrational, rotational, and other low-frequency modes in a system, and has been widely used to characterize the structure of carbon materials, particularly the defects and the degree of ordering of carbon. **Figure S3** shows the Raman spectra of GMC-S. There are two prominent peaks at 1348 and 1579 cm<sup>-1</sup>, corresponding to the D and G bands, respectively. As is known, the G band is related to the E<sub>2g</sub> vibration mode of sp<sup>2</sup> carbon domains, which can be used to explain the degree of graphitization, while the D band is associated with structural defects and partially disordered structures of sp<sup>2</sup> domains. The ID/IG ratio of GMC-S (0.98–1.03) indicates more defects and disordering under high temperature treatment, which implies that partial sp<sup>2</sup> domains are restored at different levels, and the graphitic degree for carbonized samples is improved at these temperatures.

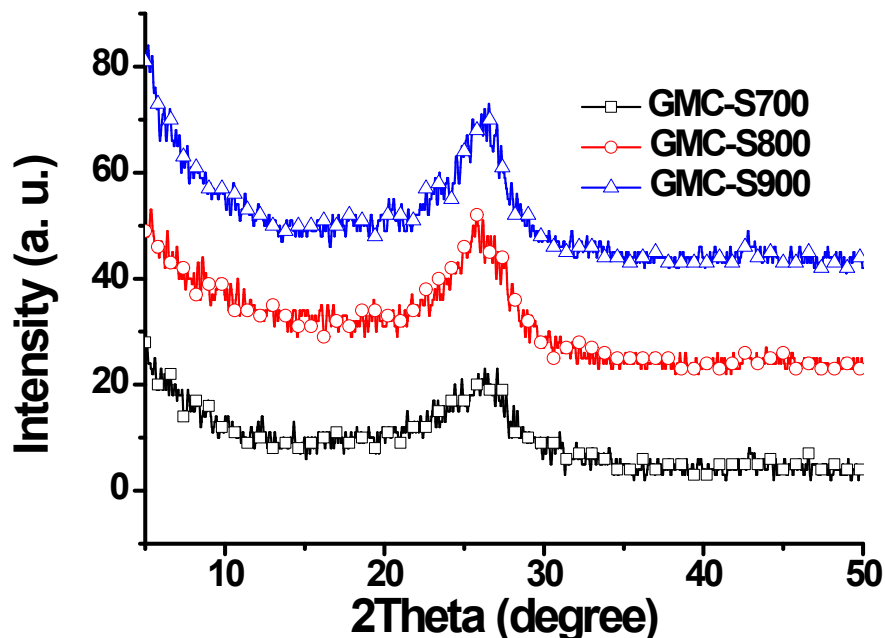

**Figure S4.** XRD spectra for GMC-S700, GMC-S800, GMC-S900.

The XRD patterns of GMC-S are shown in **Figure S4**. Thermal treatment causes the decomposition of polymer networks and results in new carbon materials with partial crystalline structure. GMC-S700, GMC-S800 and GMC-S900 all exhibit broad diffraction peaks at around  $26.2^\circ$ , which correspond to the plane (002) of graphitic carbon with an interlayer spacing of 0.340 nm. The peak intensities of GMC-Ss increase upon elevating the pyrolysis temperature, suggesting enhanced graphitization on high-temperature treatment.

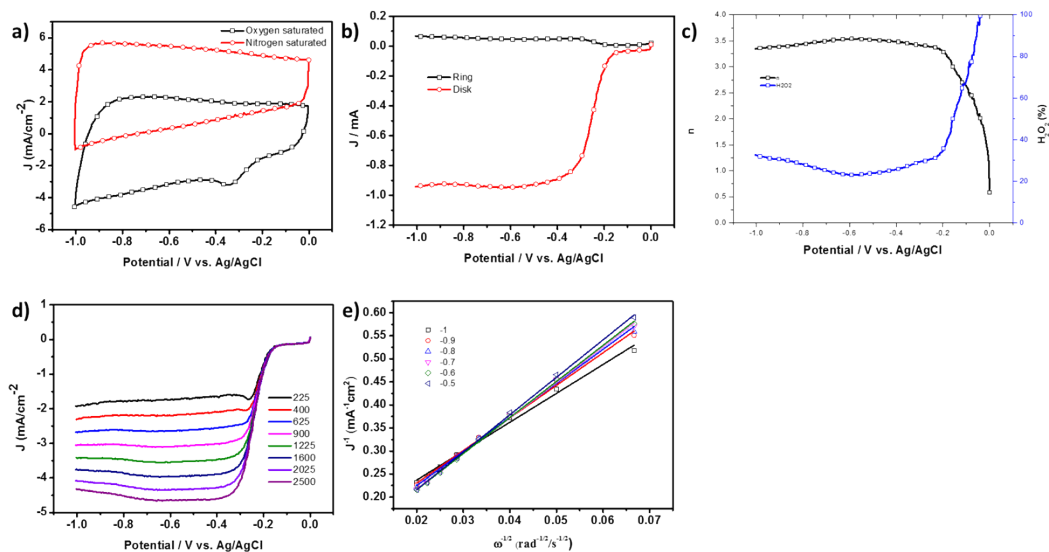

**Figure S5.** (a) CV curves of GMC-S700 in N<sub>2</sub>-saturated and O<sub>2</sub>-saturated 0.5 M NaOH at a scan rate of 50 mV s<sup>-1</sup>; (b) RRDE curve of GMC-S700 at 1600 rpm; (c) Calculated electron transfer number and percentage of peroxide; (d) RDE curves of GMC-S700 in O<sub>2</sub>-saturated 0.5 M NaOH with different speeds (225-2500 rpm) at a scan rate of 5 mV s<sup>-1</sup>; (e) Koutecky–Levich plots of GMC-S700 derived from RDE voltammograms at different electrode potentials.

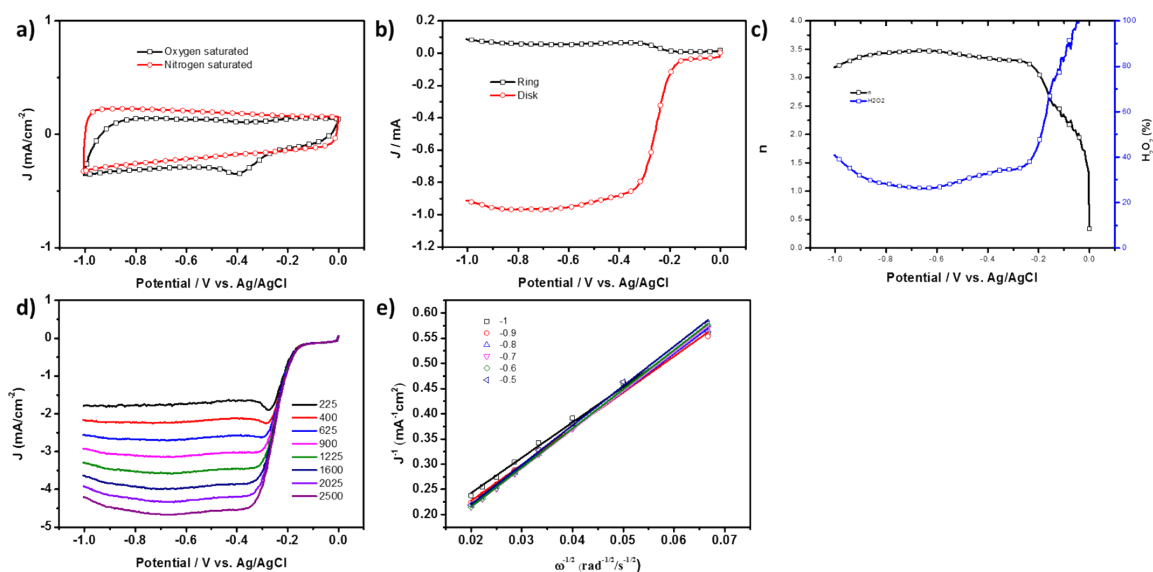

**Figure S6.** (a) CV curves of GMC-S800 in N<sub>2</sub>-saturated and O<sub>2</sub>-saturated 0.5 M NaOH at a scan rate of 50 mV s<sup>-1</sup>; (b) RRDE curve of GMC-S800 at 1600 rpm; (c) Calculated electron transfer number and percentage of peroxide; (d) RDE curves of GMC-S700 in O<sub>2</sub>-saturated 0.5 M NaOH with different speeds (225-2500 rpm) at a scan rate of 5 mV s<sup>-1</sup>; (e) Koutecky–Levich plots of GMC-S800 derived from RDE voltammograms at different electrode potentials.

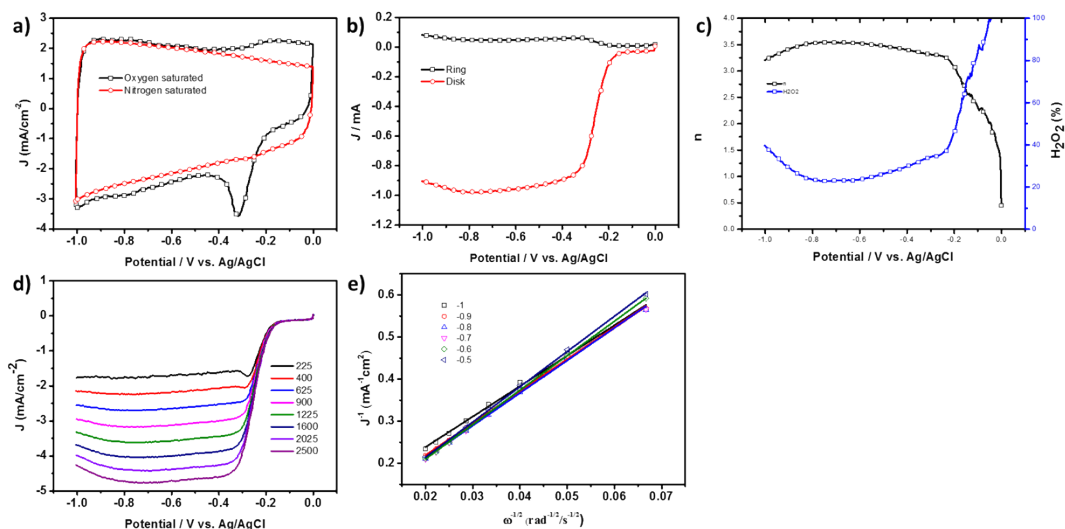

**Figure S7.** (a) CV curves of GMC-S900 in  $N_2$ -saturated and  $O_2$ -saturated 0.5 M NaOH at a scan rate of  $50 \text{ mV s}^{-1}$ ; (b) RRDE curve of GMC-S900 at 1600 rpm; (c) Calculated electron transfer number and percentage of peroxide; (d) RDE curves of GMC-S700 in  $O_2$ -saturated 0.5 M NaOH with different speeds (225-2500 rpm) at a scan rate of  $5 \text{ mV s}^{-1}$ ; (e) Koutecky–Levich plots of GMC-S900 derived from RDE voltammograms at different electrode potentials.

**Table S1.**  $J_k$  values calculated from K-L plots at different potentials vs. Ag/AgCl for GMC-S700/800/900

| Potential | GMC-S700 | GMC-S800 | GMC-S900 |
|-----------|----------|----------|----------|
| -1.0 V    | 8.95     | 9.74     | 10.62    |
| -0.9 V    | 11.21    | 11.89    | 14.79    |
| -0.8 V    | 12.93    | 14.30    | 16.99    |
| -0.7 V    | 15.72    | 16.37    | 17.36    |
| -0.6 V    | 16.82    | 16.65    | 21.36    |
| -0.5 V    | 18.57    | 15.61    | 21.08    |
